# Supplementary material for: RBP-J regulates homeostasis and function of circulating Ly6Clo monocytes
Source: eLife. 2024 Feb 26;12:RP88135. doi: 10.7554/eLife.88135 (PMC10942619; doi:10.7554/eLife.88135)
Supplement: Figure 1—figure supplement 1—source data 1. [file elife-88135-fig1-figsupp1-data1.xlsx]

## Sheet: Fig S1A
	WT								RBP-J KO
Ly6Chi	0.061647	0.058978	0.062093	0.0671028	0.107748	0.034324			0.01328	0.0525931	0.029339	0.0389461	0.010983
Ly6Clo	0.057435	0.096747	0.0552656	0.0404217					0.02756	0.016337	0.0236147

## Sheet: Fig S1B left
WT	RBP-J KO
13.9	10.3
12.9	7.4
10.9	16.2
9.05	16.2
8.76	16.2
18.3	7.84
10.3

## Sheet: Fig S1B right
WT	RBP-J KO
42.2	42.6
38.2	41.9
40.9	42
35.1	33.2
35.5	36.5
49.7	42.4
58	38.8
33.9	41.4
35.9	39.7
46.1	38.1
43	19.5
25.2	26.9
26.1

## Sheet: Fig S1C left
	WT						RBP-J KO
Ly6Chi	0.49	0.47	0.23	0.39	0.57	0.66	0.33	0.47	0.17	0.3	1	0.57
Ly6Clo	0.41	0.52	0.15	0.14	0.34	0.54	0.51	0.56	0.19	0.17	0.64	0.45

## Sheet: Fig S1C right
	WT		RBP-J KO
Ly6Chi	2	2.7	4.3	2.4
Ly6Clo	1.5	2.2	2.8	1.9
