# Supplementary material for: RBP-J regulates homeostasis and function of circulating Ly6Clo monocytes
Source: eLife. 2024 Feb 26;12:RP88135. doi: 10.7554/eLife.88135 (PMC10942619; doi:10.7554/eLife.88135)
Supplement: Figure 1—source data 1. [file elife-88135-fig1-data1.xlsx]

## Sheet: Fig 1A
	WT											RBP-J KO
Ly6Chi	3.6	1.8	1.41	1.82	2.63	2.84	3.5	1.36	1.76	1.29		3.19	2.13	3.25	1.6	3.4	2.65	4.32	0.76	2.59	1.12
Ly6Clo	2.05	1.92	0.97	0.92	1.61	1.88	1.07	1.04	1.13	1.52		2.88	4.01	5.02	3.15	5.04	1.33	4.2	2.6	4.25	2.8

## Sheet: Fig 1B
		WT												RBP-J KO
Ly6Chi	9.16	8.79	8.71	10.2	10.5	6.53	7.89	4.23	4.48	7.35	7.51	8.99		7.76	8.59	7.94	9.53	7.67	8.33	8.04	8.26	9.45	7.66	7.62	8.23
Ly6Clo	1.51	1.21	1.32	0.47	0.67	0.77	0.2	0.41	0.45	0.55	0.49	1.4		0.78	1.24	1.11	0.39	0.77	0.89	0.68	0.34	0.33	0.33	1.09	1.11

## Sheet: Fig 1C up
	WT											RBP-J KO
MDP	0.1	0.076	0.086	0.077	0.077	0.061	0.062	0.046	0.097	0.093	0.09	0.12	0.14	0.11	0.12	0.063	0.073	0.075	0.09	0.068	0.078

## Sheet: Fig 1C down
	WT											RBP-J KO
cMoP	0.35	0.38	0.36	0.35	0.33	0.33	0.33	0.79	0.7	0.54	0.64	0.4	0.5	0.35	0.47	0.24	0.35	0.35	0.77	0.74	0.68

## Sheet: Fig 1E
	WT				RBP-J KO
Ly6Clo	5.66	5.46	12	11.3	5.78	4.34	16.8	14
