# Supplementary material for: RBP-J regulates homeostasis and function of circulating Ly6Clo monocytes
Source: eLife. 2024 Feb 26;12:RP88135. doi: 10.7554/eLife.88135 (PMC10942619; doi:10.7554/eLife.88135)
Supplement: Figure 2—figure supplement 1—source data 1. [file elife-88135-fig2-figsupp1-data1.xlsx]

## Sheet: Fig S2A left
	WT							RBP-J KO
Ly6Chi	647	780	1198	1107	1399	867		939	643	492	849	1107	638	919
Ly6Clo	1561	1711	2399	2203	1250	1086		1897	1361	1100	1711	1158	809	1169

## Sheet: Fig S2A right
	WT							RBP-J KO
Ly6Chi	0.182596	0.470588	0.202159	0.177572	0.303111			0.076923	0.490467	0.073861	0.615238	0.294951
Ly6Clo	0.254009	1.47105	1.05408	2.007431*	0.854893			0.310268	0.745031		1.4587	0.789661
