# Supplementary material for: RBP-J regulates homeostasis and function of circulating Ly6Clo monocytes
Source: eLife. 2024 Feb 26;12:RP88135. doi: 10.7554/eLife.88135 (PMC10942619; doi:10.7554/eLife.88135)
Supplement: Figure 2—source data 1. [file elife-88135-fig2-data1.xlsx]

## Sheet: Fig 2C
	BM Ly6Chi
0hr	WT			RBP-J KO
12hr	0	0	0	0	0	0
36hr	56.2	49.3	49.6		68.3	49.6
48hr	49.8	49.2	38	46.2	56.1	53.3
72hr	36.7	43.1	40.8	42.3	40.8	40.8
96hr	9.11	9.25		10.1	16.2
	0.12	0.61		0.47	4.05
	BM Ly6Clo
	WT			RBP-J KO
0hr	0	0	0	0	0	0
12hr	12.1	4.76	6.76		6.92	9.34
36hr	7.41	9.04	13.2	12.8	15.2	12
48hr	23.5	21.8	31.4	24.7	23.3	24.2
72hr	19	18.8		22.4	20.8
96hr	11.5	8.2		10.2	19.2
	blood Ly6Chi
	WT			RBP-J KO
0hr	0	0	0	0	0	0
12hr	49.8	29.1	28.5	38	49.7	23.1
36hr	45.4	49.7	38.2	47.8	51.5	47.6
48hr	34.7	38.4	33.4	31.2	32.6	33.2
72hr	22.7	23.9		23.4	28.7
96hr	0.31	1.34		1.11	3.54
	blood Ly6Clo
	WT			RBP-J KO
0hr	0	0	0	0	0	0
12hr	2.92	3.04	2.35	4.61	3.72	2.3
36hr	2.19	2.96	1.72	2.04	2.61	3.18
48hr	7.27	5.69	7.01	6	6.8	5.73
72hr	13.8	10.4		12.8	12
96hr	11.1	9.24		11.3	11.3

## Sheet: Fig 2E up
	WT				RBP-J KO
1	30.3	48.7			29.6	34.3
3	6.6	11.3			9.95	15.4
7	0.69	0.77	0.59	1.03	0.86	2.93	1.12

## Sheet: Fig 2E down
	WT				RBP-J KO
1	25.7	32.5			31.2	41.8
3	22.2	21.2			21.7	21
7	6.11	6.7	4.9	4.76	6.33	6.46	5.79

## Sheet: Fig 2G
	Cx3cr1GFP/+				RBP-J KO, Cx3cr1GFP/+
GFP+	1.2	1.22	1.16	1.31	1.21	1.2	1.26	0.94
