# Supplementary material for: RBP-J regulates homeostasis and function of circulating Ly6Clo monocytes
Source: eLife. 2024 Feb 26;12:RP88135. doi: 10.7554/eLife.88135 (PMC10942619; doi:10.7554/eLife.88135)
Supplement: Figure 3—figure supplement 1—source data 1. [file elife-88135-fig3-figsupp1-data1.xlsx]

## Sheet: Fig S3A
	WT							RBP-J KO
neu	21.7	35.8	15.8	23.5	24.3	19.4	35	20.9	32.6	17.1	35.6	40.2

## Sheet: Fig S3C left
	WT							KO
CD4+T	62.1	66.3	36	43.3	27.9	46.8	39.2	48.5	45.3		44.6		36.6
	WT							KO
CD19+ B	72.2	74.5	50	59.1	41	52.9	53.7	60.5	61.5		60.9		57.5

## Sheet: Fig S3C right
	WT									KO
CD4+ T	49	63.3	31.7	38.8	21.4	39.9	36.1			39	28.7		38.6		32.9
	WT									KO
CD19+ B	56.7	61.2	47.4	45.6	32.5	45.6	46			49.4	48.8		45.7		52.6
