# Supplementary material for: RBP-J regulates homeostasis and function of circulating Ly6Clo monocytes
Source: eLife. 2024 Feb 26;12:RP88135. doi: 10.7554/eLife.88135 (PMC10942619; doi:10.7554/eLife.88135)
Supplement: Figure 3—source data 1. [file elife-88135-fig3-data1.xlsx]

## Sheet: Fig 3B left
	WT									RBP-J KO
Ly6Chi	23.1	37.7	17.9	29.1	27.5	20.1	22.9	21.8	26.9	31	17.5	25.6	16.1	30.5	23.2	24.3	32.8	22.2

## Sheet: Fig 3B right
	WT									RBP-J KO
Ly6Clo	19.7	30.2	19.1	26.9	23.6	19	25.3	18.9	28.9	59.7	34.8	39	34.3	50.8	47.6	46.1	55.5	46

## Sheet: Fig 3D up
	WT									RBP-J KO
Ly6c hi	88.1	78.3	89.1	72.3	86.8	76.9	82.1	84.9	80	94.8	81.1	82.9	87.4		73.6		86.5

## Sheet: Fig 3D down
	WT									RBP-J KO
ly6c lo	54.1	62.6	81.2	59.2	70.1	64.1	58	59.4	50.3	85.2	78.1	87.3	88.9		84.8		72.6

## Sheet: Fig 3E up
	WT									RBP-J KO
Ly6Chi	21.9	7.1	27.7	26.4	10.5	13.9	25.7	24.8	15.9	39.9	29.1	35.1	44.2		8.2		26.5

## Sheet: Fig 3E down
	WT									RBP-J KO
Ly6Clo	32.8	42.4	51.7	46.9	33.5	42.5	47.8	41.7	33.2	76.8	81.8	78.9	81.4		59		76.9
