# Supplementary material for: RBP-J regulates homeostasis and function of circulating Ly6Clo monocytes
Source: eLife. 2024 Feb 26;12:RP88135. doi: 10.7554/eLife.88135 (PMC10942619; doi:10.7554/eLife.88135)
Supplement: Figure 4—figure supplement 1—source data 1. [file elife-88135-fig4-figsupp1-data1.xlsx]

## Sheet: Fig S4A
	WT								RBP-J KO
Ly6Chi	3303	3697	2503	3374	4281	4398	4253		2897	3521	2960	2565	2176	3042	3263	4063
Ly6Clo	1664	1763	1054	1528	2130	2788	1980	2156	1528	1482	1478	1505	1127	2880	2320	2693
