# Supplementary material for: RBP-J regulates homeostasis and function of circulating Ly6Clo monocytes
Source: eLife. 2024 Feb 26;12:RP88135. doi: 10.7554/eLife.88135 (PMC10942619; doi:10.7554/eLife.88135)
Supplement: Figure 4—source data 1. [file elife-88135-fig4-data1.xlsx]

## Sheet: Fig 4A left
Ap1s1	-2.62096
Serpinb10	-2.64938
Gm4956	-2.65053
Ldlrap1	-2.67732
Tmem160	-2.79126
Rab1b	-2.81
1110008F13Rik	-2.83016
Nelfa	-2.85701
Junb	-2.90772
F11r	-2.91421
Fam65b	-3.04449
Matk	-3.06624
Itgax	-3.08097
Clptm1	-3.1382
Cd22	-3.15482
Hmga1	-3.15859
Nr4a1	-3.21685
Krt80	-3.33807
Nrarp	-3.50434
Hes1	-4.23528

## Sheet: Fig 4A right
Erdr1	5.55453
Capg	3.95054
Tnip3	3.06448
Gdpd3	3.01969
Marf1	2.99066
Ccr2	2.97969
F13a1	2.8585
Ly6c2	2.73063
Clec4d	2.7017
Lmna	2.69192
Clec4b1	2.69061
Ccr5	2.66526
Ms4a8a	2.65605
AI839979	2.64099
Fpr1	2.61758
Chsy1	2.60566
Insl6	2.59417
Fubp3	2.5911
Notch2	2.53286
Lpl	2.5129

## Sheet: Fig 4B up left
	WT											RBP-J KO
Ly6Chi	5856	5646	5106	4506	3708	4266	4026	4237	5404	4008	5039	5200	5680	4398	3893	4026	4603		3052	3785	3189
Ly6Clo	571	120	238	318	630	902	821	194	298	265	318	5697	5680	5121	2726	3374	2880		1953	2270	1892

## Sheet: Fig 4B up right
	WT								RBP-J KO
Ly6Chi	0.466964	0.872569	0.485706	0.594902	1.0706	0.35584			0.122783	0.597625	0.603272	0.611488	0.790138	0.117963
Ly6Clo	0.015398	0.029473	0.036235	0.066233	0.0499205	0.0403833	0.011165		0.187147	0.299069	0.354876	0.247194	0.167975	0.349341	0.436126

## Sheet: Fig 4B down
	WT											RBP-J KO
Ly6Chi	120	96.4	191	320	268	288	320	288	345	459	498	200	46.2	306	275	338	285	359	392	230
Ly6Clo	2500	1983	1961	2117	1434	1780	4125	3117	3619	4176	4100	1170	1006	789	813	908	1926	2085	1619	1785

## Sheet: Fig 4D up
	WT									RBP-J KO
Ly6Chi	4751	4246	4008	4352	3816	4049				4008	3831	5029	3590	4263	4643
Ly6Clo	136	248	91.2	412	344	308				2419	1112	1529	1256	2164	2227

## Sheet: Fig 4D down
	WT						RBP-J KO
Ly6Chi	978	899	925	652	658	666	935	1032	1239	737	753	745
Ly6Clo	4074	3273	3671	4416	4556	4272	1946	2297	2227	1818	1853	1693
