# Supplementary material for: RBP-J regulates homeostasis and function of circulating Ly6Clo monocytes
Source: eLife. 2024 Feb 26;12:RP88135. doi: 10.7554/eLife.88135 (PMC10942619; doi:10.7554/eLife.88135)
Supplement: Figure 5—source data 1. [file elife-88135-fig5-data1.xlsx]

## Sheet: Fig 5A
	Lyz2-Cre, CCR2RFP/+							RBP-J KO, CCR2RFP/+							RBP-J KO, CCR2RFP/RFP
Ly6Clo	480	409	347	460	190	330	181	4425	2480	3597	1227	1110			280	446	158	412	515	88.8	112

## Sheet: Fig 5C left
	Lyz2-Cre, CCR2RFP/+								RBP-J KO, CCR2RFP/+								RBP-J KO, CCR2RFP/RFP
Ly6Chi	2.16	2.92	1.53		1.99	1.28	3.74		1.31	1.38	3.5	3.76	1.12	1.25	1.98		0.26	0.22	0.17	0.16	0.25	0.35	0.31

## Sheet: Fig 5C right
	Lyz2-Cre, CCR2RFP/+								Lyz2-Cre, CCR2RFP/+								RBP-J KO, CCR2RFP/RFP
Ly6CLO	2.09	1.93	0.74	1.39	1.05	1.65			2.81	1.98	1.77	2.38	2.11	3.28	3.62		1.39	1.09	0.67	1.58	0.51	1.49	0.95

## Sheet: Fig 5D
	Lyz2-Cre, CCR2RFP/+							RBP-J KO, CCR2RFP/+							RBP-J KO, CCR2RFP/RFP
Ly6Clo	836	1246	1542	1478	1654				116	234	84.9	264	342	332	83.3	302	100	292	353	323	299
