# Supplementary material for: RBP-J regulates homeostasis and function of circulating Ly6Clo monocytes
Source: eLife. 2024 Feb 26;12:RP88135. doi: 10.7554/eLife.88135 (PMC10942619; doi:10.7554/eLife.88135)
Supplement: Figure 6—figure supplement 1—source data 1. [file elife-88135-fig6-figsupp1-data1.xlsx]

## Sheet: Fig S6B
	Lyz2-Cre		RBP-J KO
BM Ly6Chi	55.4	54.9	54.5	52.8
BM Ly6Clo	6.29	7.73	5.08	5.69
lung Ly6Chi	3.16	7.18	8.16	12.9
lung Ly6Clo	3.88	1.28	3.25	3.05
CD16.2+	2.02	0.1	1.3	0.81
