# Supplementary material for: RBP-J regulates homeostasis and function of circulating Ly6Clo monocytes
Source: eLife. 2024 Feb 26;12:RP88135. doi: 10.7554/eLife.88135 (PMC10942619; doi:10.7554/eLife.88135)
Supplement: Figure 6—source data 1. [file elife-88135-fig6-data1.xlsx]

## Sheet: Fig 6B up
	WT											RBP-J KO
Ly6Chi	2.68	3.84	0.9	1.84	0.9	2.17	3.58	3.48	4.38	4.25	3.14	2.52	2.06		2.22	1.02	1.9	4.81	4.26	4.52	2.48	2.16
Ly6Clo	1.07	1.05	0.18	0.2	0.45	0.67	1.37	1.41	1.73	0.91	1.34	5.98	6.43		1.4	2.08	2.77	3.86	3.65	4.82	2.1	4.11
IM	1.6	1.24	0.45	0.57	0.2	0.23	1.29	1.23	1.35	1.57	1.6	1.15	1.68		0.98	0.37	0.86	1.48	1.43	1.48	1.74	2.05
CD16.2+	0.12	0.049	0.029	0.04	0.00943	0.013	0.054	0.037	0.036	0.025	0.037	0.42	0.56		0.53	0.19	0.34	0.23	0.3	0.27	0.23	0.49
CD206-	0.84	0.59	0.16	0.29	0.086	0.071	0.6	0.51	0.55	0.63	0.69	0.4	0.65		0.23	0.084	0.24	0.65	0.59	0.66	0.72	0.85
CD206+	0.64	0.59	0.26	0.24	0.098	0.15	0.61	0.66	0.72	0.91	0.85	0.31	0.44		0.22	0.099	0.27	0.53	0.46	0.45	0.74	0.66

## Sheet: Fig 6B down
	WT											RBP-J KO
Ly6Chi	3.24663	4.91233	0.603182	1.94151	0.943618	1.8908	2.346	1.85309	3.71843	6.96964	3.77905	2.951	2.78592		1.63303	0.657572	1.24155	4.08812	3.73932	3.78026	2.54642	1.76043
Ly6Clo	1.29392	1.33852	0.122674	0.212657	0.474964	0.581783	0.898242	0.754012	1.4715	1.49436	1.62546	7.00607	8.6969		1.03288	1.34313	1.80924	3.28119	3.19953	4.02787	2.21353	3.34203
IM	1.94407	1.58497	0.302963	0.605351	0.205938	0.202572	0.842788	0.649199	1.14391	2.57181	2.26233	1.34655	2.27515		0.723359	0.242278	0.560328	1.25312	1.25829	1.2337	1.67893	1.66905
CD16.2+	1427.59	629.66	195.965	432.841	99.1385	116.507	351.704	188.429	308.338	412.405	576.954	4949.3	7577		3872.22	1201.5	2191.48	1971.34	2647.14	2281.92	2238.04	4016.46
CD206-	10193.2	7575.6	1077.81	3067.53	901.259	616.36	3913.41	2611.51	4681.93	10265.1	9622.37	4636.57	8832.15		1691.41	539.967	1548.76	5524.14	5174.99	5519.31	6959.22	6886.33
CD206+	7774.46	7565.76	1732.33	2540.59	1031.94	1274.06	3976.68	3550.72	6125.22	14853.5	11982.9	3675.72	5999.1		1622.73	638.913	1758.28	4525.32	4078.76	3737.78	7164.14	5364.97

## Sheet: Fig 6C right
WT				RBP-J KO
17.5183	17.2543	17.261	17.29	20.1763	19.576	18.4907	18.4097

## Sheet: Fig 6E up
	WT										RBP-J KO										WT LPS										RBP-J KO LPS
Ly6Chi	3.74	2.73	3.69	1.5	5.45	6.42	4.22				4.2	1.88	2.74	3.24	3.3	5.81	5.79				2.53	1.99	1.98	2.12	1.59	1.16	1.2	4.49	4.71	4.18	3.11	1.89	1.69	1.97	1.15	1.37	3.07	3.9	3.72
Ly6Clo	0.78	0.96	1.96	1.75	1.86	3.63	2.18				3.59	3.08	5.5	7.9	4.64	3.15	3.05				0.77	0.91	0.87	0.87	1.46	1.65	1.7	2.51	2.38	2.47	3.32	6.04	3.21	3.84	3.52	3.13	4.44	4.82	5.18
IM	0.53	0.43	0.48	0.48	0.72	0.76	0.58				1.06	0.68	1.92	2.14	1.96	0.73	0.88				0.73	0.83	0.77	1	1.43	1.68	1.73	1.32	1.36	2.31	0.69	1.03	1.06	1.6	2.08	1.65	3.15	2.19	2.12
CD16.2+IM	0.064	0.039	0.017	0.011	0.088	0.02	0.023				0.57	0.23	1.38	1.17	1.12	0.36	0.45				0.052	0.14	0.13	0.065	0.17	0.2	0.13	0.052	0.058	0.19	0.26	0.52	0.53	0.54	1.16	0.31	0.87	1.08	0.66
CD206-	0.27	0.22	0.25	0.29	0.34	0.24	0.25				0.33	0.23	0.32	0.32	0.39	0.2	0.22				0.4	0.49	0.46	0.56	1.17	1.25	1.36	0.73	0.71	1.29	0.34	0.38	0.36	0.92	0.82	1.11	1.65	0.49	0.87
CD206+	0.19	0.16	0.21	0.18	0.28	0.49	0.29				0.15	0.2	0.2	0.6	0.43	0.15	0.2				0.27	0.17	0.15	0.36	0.062	0.13	0.19	0.47	0.53	0.66	0.057	0.086	0.11	0.092	0.017	0.12	0.3	0.53	0.48

## Sheet: Fig 6E down
	WT										RBP-J KO										WT LPS										RBP-J KO LPS
Ly6chi	5.66983	4.77043	5.74545	1.54478	6.95836	8.86035	6.90188				8.24548	2.21045	3.44654	5.90205	3.31195	7.37513	6.59824				4.10275	7.35483	8.03024	4.60642	8.63146	5.22221	3.15557	10.6123	11.8637	13.2451	10.4687	6.54692	4.83077	7.6657	6.14413	6.11003	12.2522	7.04856	8.471
Ly6Clo	1.18851	1.67256	3.04673	1.80249	2.37148	5.00056	3.56892				7.05759	3.61815	6.92987	14.4141	4.65387	3.99988	3.47541				1.2465	3.34391	3.52284	1.88866	7.94209	7.41801	4.48965	5.93665	6.00525	7.84408	11.2015	20.8631	9.16859	14.9192	18.7979	13.9991	17.7183	8.72449	11.8003
IM	0.806903	0.743319	0.740553	0.489676	0.925124	1.04503	0.942199				2.09229	0.802991	2.41815	3.89995	1.96023	0.927804	1.00718				1.19062	3.05425	3.12321	2.17794	7.7468	7.54372	4.57173	3.11468	3.4338	7.31083	2.32737	3.55231	3.01731	6.2272	11.0957	7.37027	12.5878	3.95705	4.82828
CD16.2+IM	976.359	682.366	270.999	117.798	1128.85	271.224	377.01				11197.6	2668.61	15355.3	19399.2	11245.4	4583.07	5141.75				841.887	5020.69	5094.1	1400.96	9044.54	9154.7	3398.59	1236.99	1458.39	6029.67	11856.2	18007.7	15166.7	20976.6	60000	13769.1	34869.3	19593.3	14932
CD206-	4153.66	3860.35	3866.44	2943.13	4384.04	3276.39	4039.85				6578.22	2680.65	4019.48	5786.93	3939.38	2599.28	2521.94				6426.65	18232.2	18453	12120.9	63311.8	56067.6	36028.8	17381.3	17964.1	40935.7	11465.4	12961.5	10192.3	35576.3	43619.9	49408.2	65714.2	8910.17	19876.7
CD206+	2925.77	2836.8	3260.04	1803.21	3580.26	6826.71	4748.37				2867.32	2288.41	2514.68	10995.2	4268.69	1960.9	2239.7				4390.88	6131.03	5893.35	7865.44	3347.83	5918.51	5044.86	11228.1	13442.6	20889.8	1923.32	2969.23	3185.9	3584.48	898.187	5221.33	11926.3	9587.24	10821.2
