# Supplementary material for: RBP-J regulates homeostasis and function of circulating Ly6Clo monocytes
Source: eLife. 2024 Feb 26;12:RP88135. doi: 10.7554/eLife.88135 (PMC10942619; doi:10.7554/eLife.88135)
Supplement: Figure 7—source data 1. [file elife-88135-fig7-data1.xlsx]

## Sheet: Fig 7B up
	Lyz2cre/cre Ccr2RFP/+						Rbpjfl/flLyz2cre/creCcr2RFP/+						Lyz2cre/creCcr2RFP/RFP						Rbpjfl/flLyz2cre/creCcr2RFP/RFP
Ly6Chi	3.74	2.86	6.16		2.52	3.31	5.67	3.24	4.56	3.7	2.85		2.69	2.65	1.52	1.56	1.97		1.03	0.33	1.24		2.48
Ly6Clo	2.08	1.33	1.09		2.17	2.01	3.29	3.12	2.96	3.95	4.5		1.62	1.25	1.1	2.3	2.67		1.63	0.69	1.94		2.97
IM	0.8	0.82	1.18		2.54	1.61	2.3	1.94	2.66	3.01	3.91		0.92	1.12	1.26	2.3	2.54		1.62	0.52	1.72		1.82

## Sheet: Fig 7B down
	Lyz2cre/cre Ccr2RFP/+						Rbpjfl/flLyz2cre/creCcr2RFP/+						Lyz2cre/creCcr2RFP/RFP						Rbpjfl/flLyz2cre/creCcr2RFP/RFP
Ly6Chi	1.65462	3.00443	4.40295		4.75477	4.8185	12.6634	3.87008	9.31701	7.47959	5.51846		1.20659	0.452437	1.81191	1.47639	2.18914		0.79147	0.795478	1.66471		3.13553
Ly6Clo	0.918924	1.39897	0.77949		4.10058	2.91836	7.36167	3.72512	6.06161	7.99389	8.72975		0.725363	2.13478	1.30584	2.18486	2.97544		1.25086	1.6496	2.60622		3.75228
IM	0.355105	0.858128	0.845053		4.79812	2.34754	5.14916	2.32256	5.44112	6.083	7.57927		0.411861	1.90684	1.5007	2.17973	2.82861		1.24513	1.24612	2.3124		2.29842

## Sheet: Fig 7C up
	Lyz2cre/cre Ccr2RFP/+						Rbpjfl/flLyz2cre/creCcr2RFP/+						Lyz2cre/creCcr2RFP/RFP						Rbpjfl/flLyz2cre/creCcr2RFP/RFP
CD16.2+	0.14	0.13	0.34		0.18	0.17	1.77	1.21	1.64	1.33	1.63		0.15	0.17	0.26	0.19	0.29		1.03	0.3	0.95		0.7
CD206-	0.39	0.37	0.56		1.11	0.86	0.36	0.44	0.73	0.88	1.3		0.39	0.49	0.49	1.02	1.11		0.43	0.14	0.48		0.5
CD206+	0.25	0.29	0.25		1.19	0.54	0.12	0.2	0.21	0.65	0.8		0.35	0.41	0.41	1.02	1.05		0.11	0.055	0.21		0.48

## Sheet: Fig 7C down
	Lyz2cre/cre Ccr2RFP/+						Rbpjfl/flLyz2cre/creCcr2RFP/+						Lyz2cre/creCcr2RFP/RFP						Rbpjfl/flLyz2cre/creCcr2RFP/RFP
CD16.2+	630.492	1398.97	2445.25		3487.71	2527.04	39536.4	14457.6	33561.3	26954.3	31569.5		688.241	2919.81	3127.77	1763.47	3201.86		7126.16	7943.38	12788.3		8784.09
CD206-	1729.63	3886.34	3974.33		20971.6	12456.1	8066.37	5302.4	14957.4	17784.4	25121.1		1761.25	8441.49	5886.46	9676.01	12382.3		3331.81	3461.09	6484.07		6279.18
CD206+	1100.34	3016.18	1800.3		22392.9	7904.29	2574.88	2406.4	4346.65	13111.3	15541.5		1548.54	7084.58	4935.61	9688.83	11716		825.229	1319.42	2801.49		6055.77
